# Supplementary material
Source: PubMed Central journal article supplement (PMC1965550)
Supplement: pnas_0610344104_1.pdf [file pnas_0610344104_1.pdf]

**Table 1. Results from two-way ANOVAs showing main effects of sex (Sex), main effects of status (Status), and sex-by-status interactions for overall volume, cell number, and cell size in six brain regions as well as cortical thickness**

|                                  |                    | <u>Sex</u>            | <u>Status</u>                             | <u>Sex-by-Status</u>  |
|----------------------------------|--------------------|-----------------------|-------------------------------------------|-----------------------|
| <b><u>BSTp</u></b>               |                    |                       |                                           |                       |
|                                  | <i>Volume</i>      | $F = 0.14, P = 0.713$ | <b><math>F = 4.98, P = 0.034^*</math></b> | $F = 2.71, P = 0.11$  |
|                                  | <i>Cell number</i> | $F = 3.25, P = 0.082$ | $F = 1.49, P = 0.233$                     | $F = 0.17, P = 0.68$  |
|                                  | <i>Cell size</i>   | $F = 0.09, P = 0.771$ | $F = 0.81, P = 0.376$                     | $F = 0.40, P = 0.532$ |
| <b><u>PVN</u></b>                |                    |                       |                                           |                       |
|                                  | <i>Volume</i>      | $F = 0.03, P = 0.855$ | <b><math>F = 7.86, P = 0.009^*</math></b> | $F = 0.63, P = 0.434$ |
|                                  | <i>Cell number</i> | $F = 0.08, P = 0.775$ | $F = 0.10, P = 0.757$                     | $F = 0.36, P = 0.553$ |
|                                  | <i>Cell size</i>   | $F = 1.29, P = 0.265$ | $F = 3.97, P = 0.057$                     | $F = 2.61, P = 0.118$ |
| <b><u>SCN</u></b>                |                    |                       |                                           |                       |
|                                  | <i>Volume</i>      | $F = 1.39, P = 0.249$ | $F = 2.46, P = 0.129$                     | $F = 0.003, P = 0.96$ |
|                                  | <i>Cell number</i> | $F = 0.17, P = 0.898$ | $F = 0.13, P = 0.727$                     | $F = 0.63, P = 0.434$ |
|                                  | <i>Cell size</i>   | $F = 0.16, P = 0.693$ | $F = 0.28, P = 0.601$                     | $F = 0.37, P = 0.548$ |
| <b><u>MeA</u></b>                |                    |                       |                                           |                       |
|                                  | <i>Volume</i>      | $F = 0.02, P = 0.884$ | <b><math>F = 9.72, P = 0.005^*</math></b> | $F = 2.08, P = 0.163$ |
|                                  | <i>Cell number</i> | $F = 0.04, P = 0.839$ | $F = 2.18, P = 0.154$                     | $F = 1.56, P = 0.225$ |
|                                  | <i>Cell size</i>   | $F = 0.71, P = 0.406$ | $F = 3.29, P = 0.081$                     | $F = 0.36, P = 0.554$ |
| <b><u>VMH</u></b>                |                    |                       |                                           |                       |
|                                  | <i>Volume</i>      | $F = 0.49, P = 0.490$ | $F = 1.33, P = 0.262$                     | $F = 0.25, P = 0.623$ |
|                                  | <i>Cell number</i> | $F = 0.04, P = 0.839$ | <b><math>F = 4.73, P = 0.040^*</math></b> | $F = 0.15, P = 0.706$ |
|                                  | <i>Cell size</i>   | $F = 2.11, P = 0.159$ | $F = 0.45, P = 0.509$                     | $F = 0.75, P = 0.395$ |
| <b><u>ACo</u></b>                |                    |                       |                                           |                       |
|                                  | <i>Volume</i>      | $F = 0.72, P = 0.405$ | $F = 0.25, P = 0.620$                     | $F = 2.59, P = 0.119$ |
|                                  | <i>Cell number</i> | $F = 0.06, P = 0.799$ | $F = 1.06, P = 0.314$                     | $F = 2.45, P = 0.130$ |
|                                  | <i>Cell size</i>   | $F = 0.01, P = 0.919$ | $F = 2.40, P = 0.133$                     | $F = 0.10, P = 0.756$ |
|                                  |                    |                       |                                           |                       |
| <b><u>Cortical Thickness</u></b> |                    | $F = 0.14, P = 0.712$ | $F = 0.26, P = 0.612$                     | $F = 0.20, P = 0.657$ |

Note that all statistically significant effects are main effects of status. Bold asterisked data indicate statistically significant effect.
